# Supplementary material
Source: PubMed Central journal article supplement (PMC7520447)
Supplement: BPH-177-4701-s001.pdf [file BPH-177-4701-s001.pdf]

**Title: Enhanced Klotho availability protects against cardiac dysfunction induced by uraemic cardiomyopathy by regulating Ca<sup>2+</sup> handling**

José Alberto Navarro-García<sup>1</sup>, Angélica Rueda<sup>2</sup>, Tatiana Romero-García<sup>2</sup>, Jennifer Aceves-Ripoll<sup>1</sup>, Elena Rodríguez-Sánchez<sup>1</sup>, Laura González-Lafuente<sup>1</sup>, Carlos Zaragoza<sup>3</sup>, María Fernández-Velasco<sup>4</sup>, Makoto Kuro-o<sup>5</sup>, Luis M. Ruilope<sup>1, 6, 7</sup>, Gema Ruiz-Hurtado<sup>1,6\*</sup>

**Supplemental Figures**

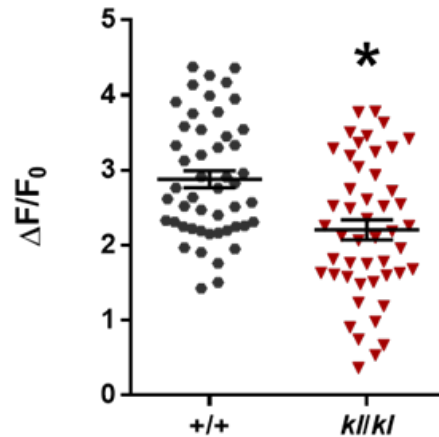

**Supplemental Figure S1:** Change in peak amplitude as  $\Delta F/F_0 = (F - F_0)/F_0$  in cardiomyocytes from +/+ (n=50 cells/N=5 mice) and kl/kl (n=49 cells/N=5 mice) mice. Data are shown as mean $\pm$ SEM. \* $P < 0.05$  vs. +/+ mice.

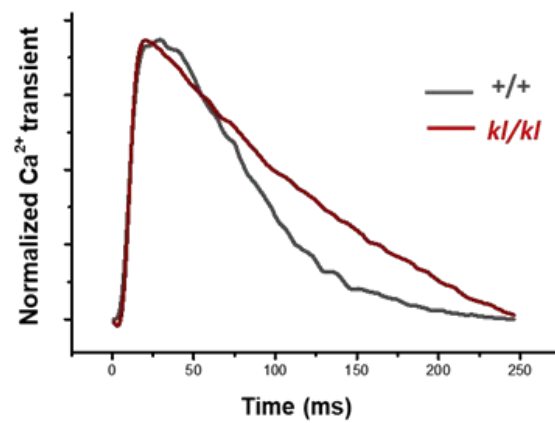

**Supplemental Figure S2.** Representative normalisation of Ca<sup>2+</sup> transients to the peak of fluorescence obtained in cardiomyocytes from a +/+ (dark grey line) and *kl/kl* (dark red line) mice.

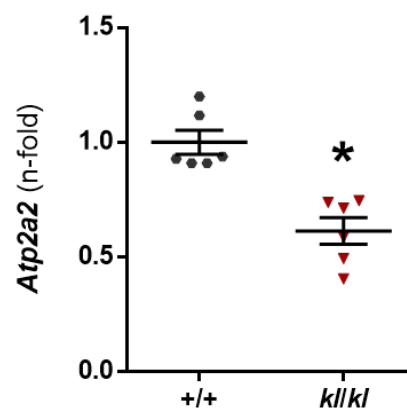

**Supplemental Figure S3.** mRNA expression of SERCA2a (*Atp2a2*) in +/+ (N=6 mice) and *kl/kl* (N=6 mice) mice. Data are shown as mean $\pm$ SEM. \* $P < 0.05$  vs. +/+ mice.

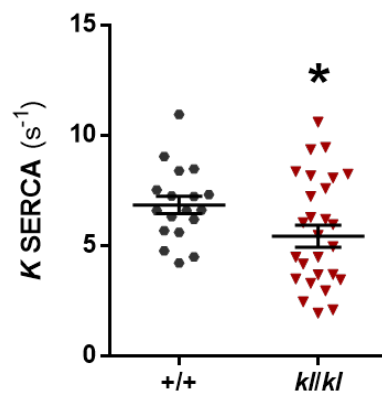

**Supplemental Figure S4:** *K* SERCA in cardiomyocytes from +/+ (n=18 cells/N=5 mice) and kl/kl (n=27 cells/N=5 mice) mice. Data are shown as mean±SEM. \**P*<0.05 vs. +/+ mice.

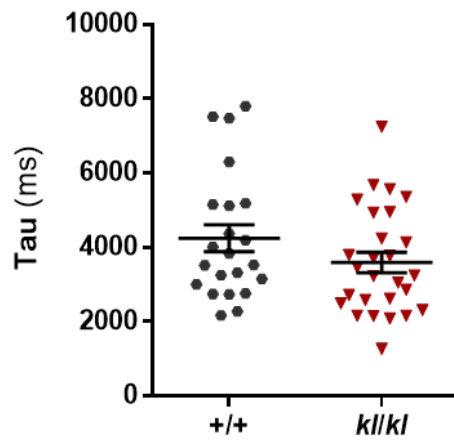

**Supplemental Figure S5.** Time of decay (Tau) of caffeine-evoked intracellular  $\text{Ca}^{2+}$  transients in +/+ (n=37 cells/N=5 mice) and *kl/kl* (n=46 cells/N=5 mice) mice.

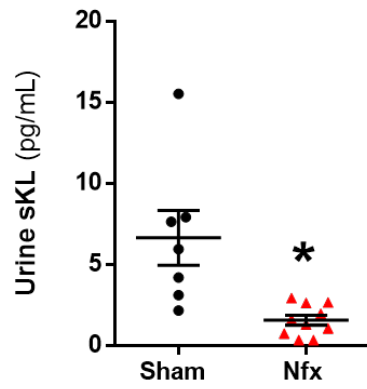

**Supplemental Figure S6.** Urine levels of sKL in Sham (N=7 mice) compared to *Nfx* mice (N=10 mice). \* $P < 0.05$  vs. *Sham*.

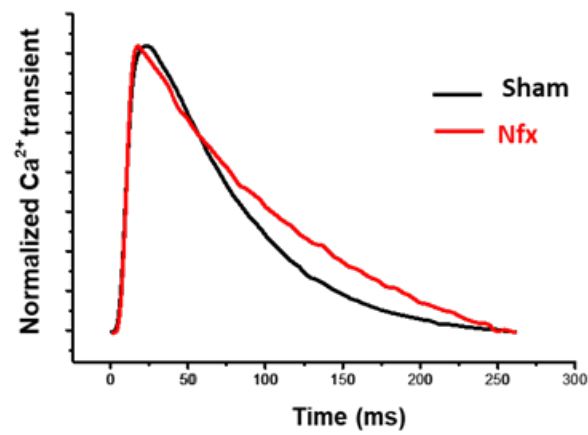

**Supplemental Figure S7.** Representative normalisation of Ca<sup>2+</sup> transients to the same peak of fluorescence obtained in cardiomyocytes from a Sham (black line) and Nfx (red line) mice.

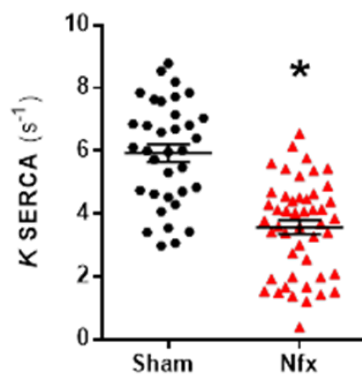

**Supplemental Figure S8:** *K* SERCA in cardiomyocytes from *Sham* (n=35 cells/N=5 mice) and *Nfx* (n=48 cells/N=6 mice) mice. Data are shown as mean±SEM. \**P*<0.05 vs. *Sham* mice.
